# Supplementary material
Source: PubMed Central journal article supplement (PMC4239185)
Supplement: NIHMS633766-supplement-1.pdf [file NIHMS633766-supplement-1.pdf]

**Supplemental Table 1: Animals used in study**

| <b>Infection status and Strain</b> | <b>Animal ID</b> | <b>Plasma Viral Load</b> | <b>Weeks post infection</b> |
|------------------------------------|------------------|--------------------------|-----------------------------|
| uninfected                         | Rh07045          | 0                        | 0                           |
|                                    | Rh16647          |                          |                             |
|                                    | Rh18107          |                          |                             |
|                                    | Rh22499          |                          |                             |
|                                    | Rh22618          |                          |                             |
|                                    | Rh23300          |                          |                             |
|                                    | Rh25272          |                          |                             |
|                                    | Rh26118          |                          |                             |
|                                    | Rh26144          |                          |                             |
|                                    | Rh26483          |                          |                             |
|                                    | Rh27365          |                          |                             |
|                                    | Rh28450          |                          |                             |
|                                    | Rh28209          |                          |                             |
|                                    | Rh28552          |                          |                             |
| Rh31557                            |                  |                          |                             |
| Rh30530                            |                  |                          |                             |
| Rh99079                            |                  |                          |                             |
| SIV mac239                         | Rh24511          | 2,460,000                | 6                           |
|                                    | Rh25988          | 170,000                  | 27                          |
|                                    | Rh26407          | 16,000                   | 23                          |
|                                    | Rh26760          | 510,000                  | 19                          |
|                                    | Rh27603          | 890,000                  | 18                          |
|                                    | Rh27643          | 560,000                  | 24                          |
|                                    | Rh27931          | 300,000                  | 25                          |
|                                    | Rh28401          | 210,000                  | 19                          |
| SIVsmE660                          | Rh1999           | 23,400                   | 11                          |
|                                    | Rh01016          | 52                       | 11                          |
|                                    | Rh01061          | 252,000                  | 11                          |
|                                    | Rh03011          | 1,070                    | 11                          |
|                                    | Rh05033          | 810                      | 11                          |
|                                    | Rh05040          | 442                      | 11                          |
|                                    | Rh06004          | 16                       | 11                          |
|                                    | Rh07015          | 1,400                    | 11                          |
|                                    | Rh07030          | 14,100                   | 11                          |
|                                    | Rh07039          | 19,900                   | 2                           |
|                                    | Rh07044          | 2,160                    | 12                          |
|                                    | Rh07046          | 1,420                    | 8                           |
|                                    | Rh07047          | 36,900                   | 9                           |
|                                    | Rh90132          | 115,000                  | 11                          |
|                                    | Rh94048          | 4,100,000                | 11                          |
|                                    | Rh96022          | 312                      | 12                          |
|                                    | Rh99002          | 26                       | 12                          |
|                                    | Rh99037          | 17,700                   | 11                          |
|                                    | Rh99047          | 89,500                   | 11                          |
|                                    | Rh99079          | 2,740                    | 2                           |
| Rh99080                            | 162,000          | 11                       |                             |

# Supplemental Figure 1

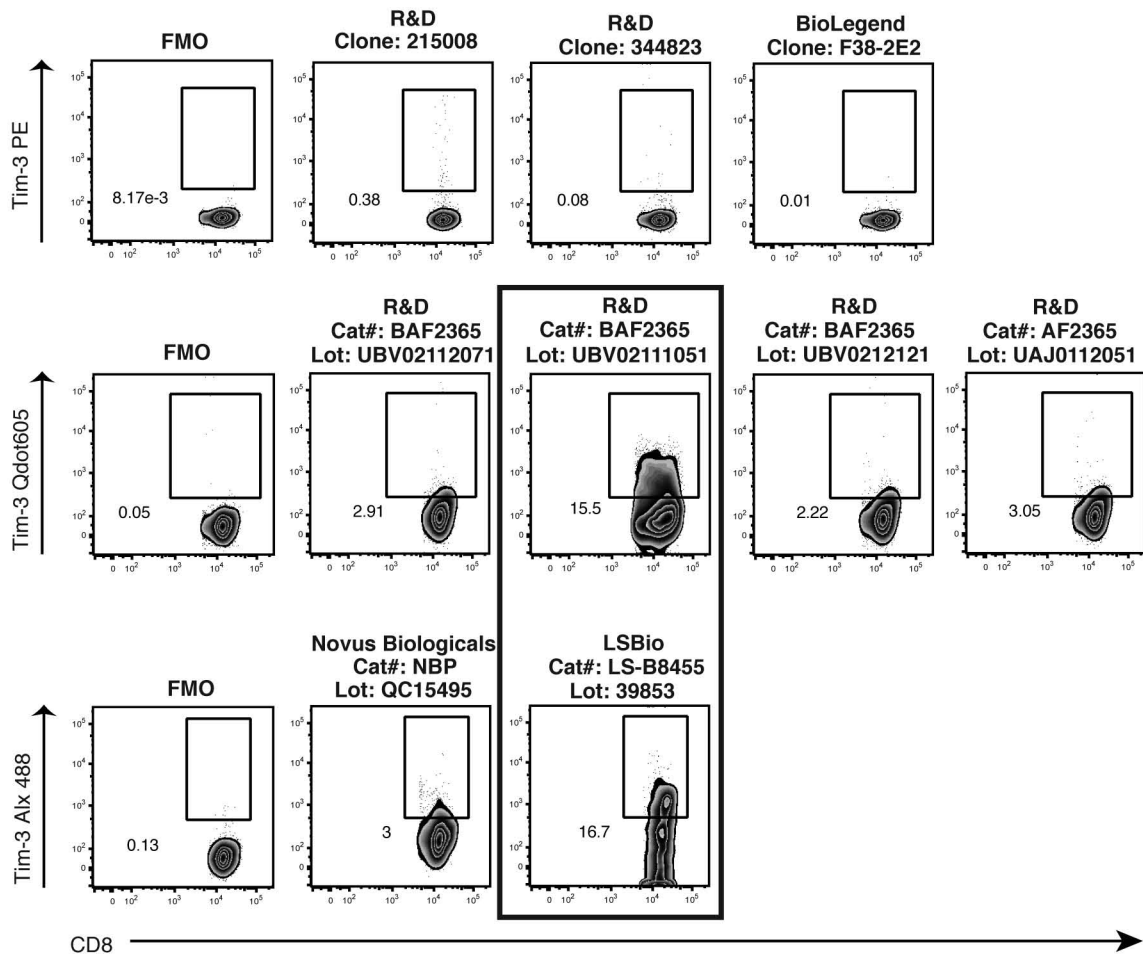

**Supplemental Figure 1. Antibody Screen.** Commercially available anti-Tim-3 antibodies for mouse or human were tested for its cross-reactivity to rhesus Tim-3 by flow cytometry after 3 days anti-CD3 mAb and anti-CD28 mAb stimulation.

## Supplemental Figure. 2

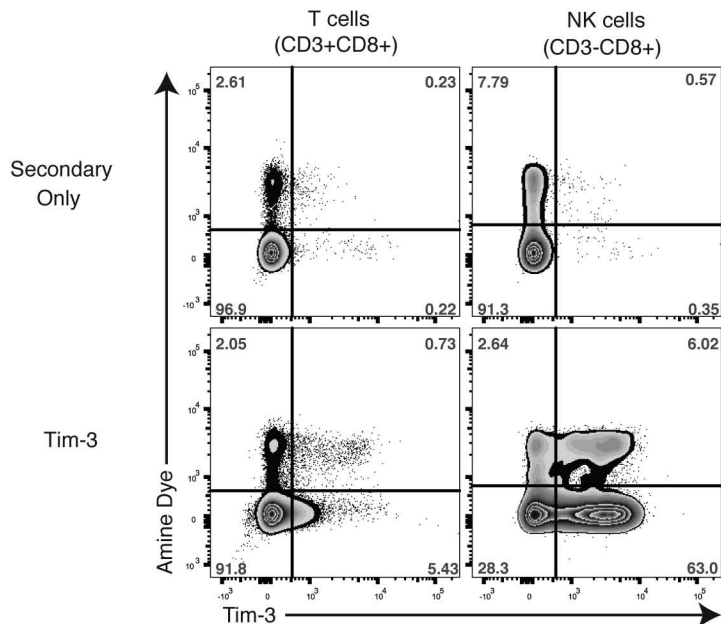

**Supplemental Figure 2. Comparison of rhesus Tim-3 expression in cellular sub-populations.** Graphs show the frequency [%] of live Tim-3 expression on CD3<sup>+</sup> T cells (Left) and NK cells (Right) from PBMC in a representative SIV-uninfected animal.

### Supplemental Figure 3

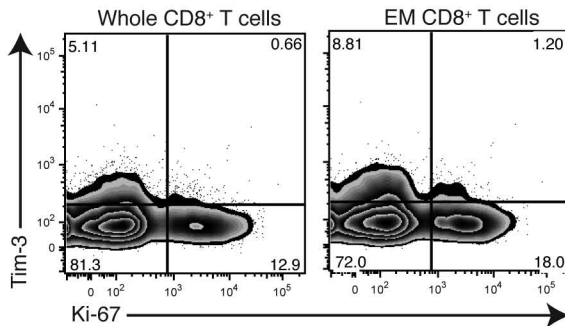

**Supplemental Figure 3. Tim-3<sup>+</sup>CD8<sup>+</sup> T cells have a lower proliferative status based on Ki67 index in acute SIV infection.** Flow plots show CD8<sup>+</sup> T cells from PBMC in SIVmac251 infected animals analysed at 2 W.P.I. and gated on whole (left) or effector memory (right) CD8 T cell populations.
